# Supplementary material for: Tannic acid-assisted surface encasing of bismuth nanoparticles on carbon felt for high-performance vanadium redox flow batteries
Source: Royal Society of Chemistry journal article supplement (doi:10.1039/d5ta02492g), 2025-01-01
Supplement: d5ta02492g1.pdf [file d5ta02492g1.pdf]

## Supporting Information

### **Tannic acid-assisted surface encasing of bismuth nanoparticle on carbon felt for high-performance vanadium redox flow batteries**

Jining Sun<sup>a,b</sup>, Wenbo Zhang<sup>a</sup>, Mengfan Lv<sup>a</sup>, Jingren Chen<sup>a</sup>, Mingming Zhao<sup>a</sup>, Yu Cao<sup>a</sup>, Jin Wang<sup>a</sup>, Tao Fang<sup>c</sup>, Hongdong Jiang<sup>c,\*</sup>, Lei Zhang<sup>a,b,\*</sup>

<sup>a</sup> *School of Mechanical Engineering, Dalian University of Technology, Dalian, 116024, China.*

<sup>b</sup> *State Key Laboratory of High-performance Precision Manufacturing, Dalian University of Technology, Dalian, 116024, China.*

<sup>c</sup> *Wontai Power Company, Shanghai, 201613, China.*

---

\*Corresponding authors.

*E-mail address:* lei.zhang@dlut.edu.cn (L. Zhang).

## Supplementary Figures

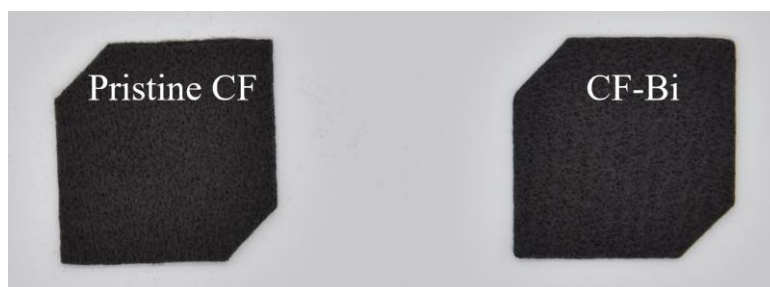

**Fig. S1** The digital photos of pristine carbon felt (CF) and bismuth nanoparticles-loaded CF (CF-Bi).

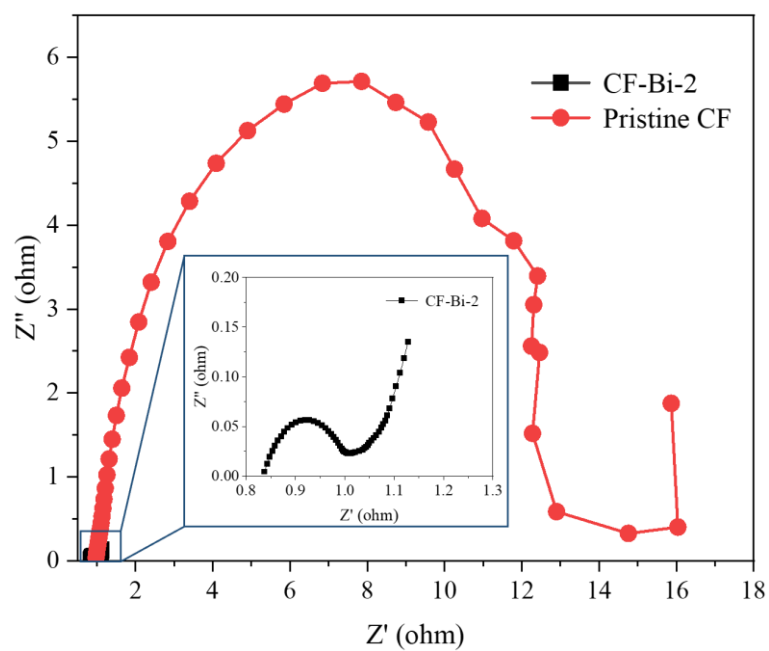

**Fig. S2** The electrochemical impedance spectroscopy (EIS) diagrams of the pristine carbon felt and CF-Bi-2.

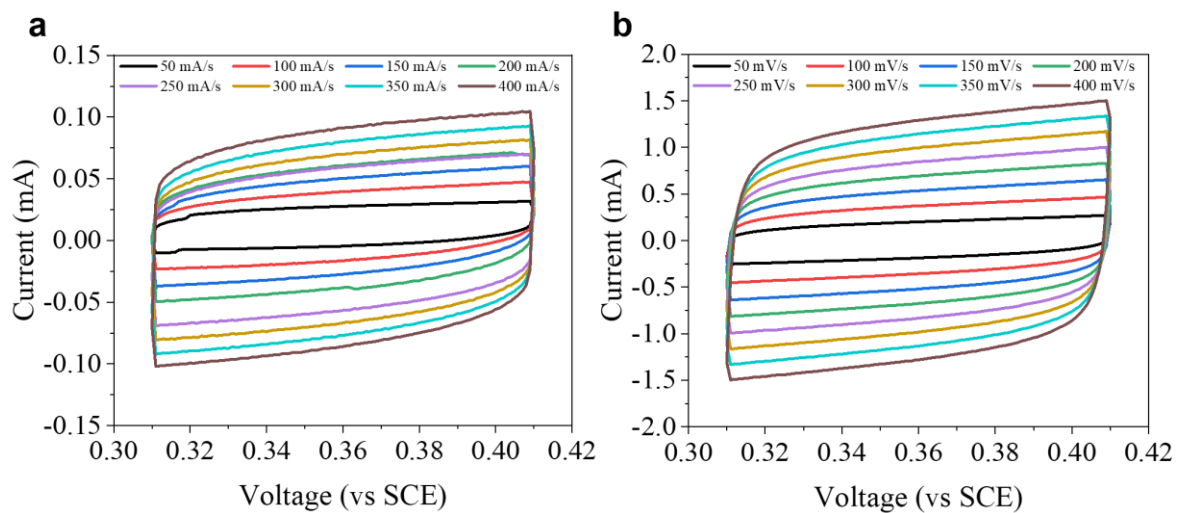

**Fig. S3** Cyclic voltammetry curves for determining electrochemical active surface area (ECSA) of (a) Pristine CF and (b) CF-Bi-2.

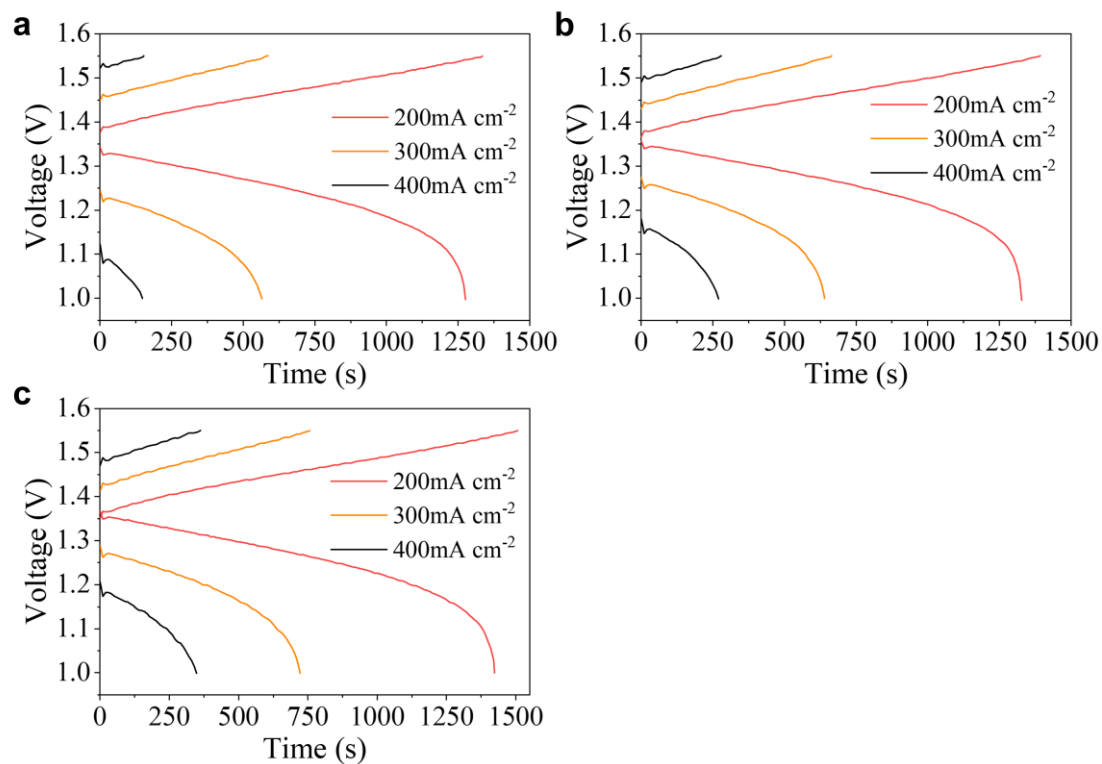

**Fig. S4** The charge-discharge curves of pristine CF (a), CF-Bi-1 (b), and CF-Bi-3 (c), in which the mass ratio of  $\text{Bi}(\text{NO}_3)_3 \cdot 5\text{H}_2\text{O}$ /tannic acid is 1.5 and 2.5 for preparation of CF-Bi-1 and CF-Bi-3, respectively.

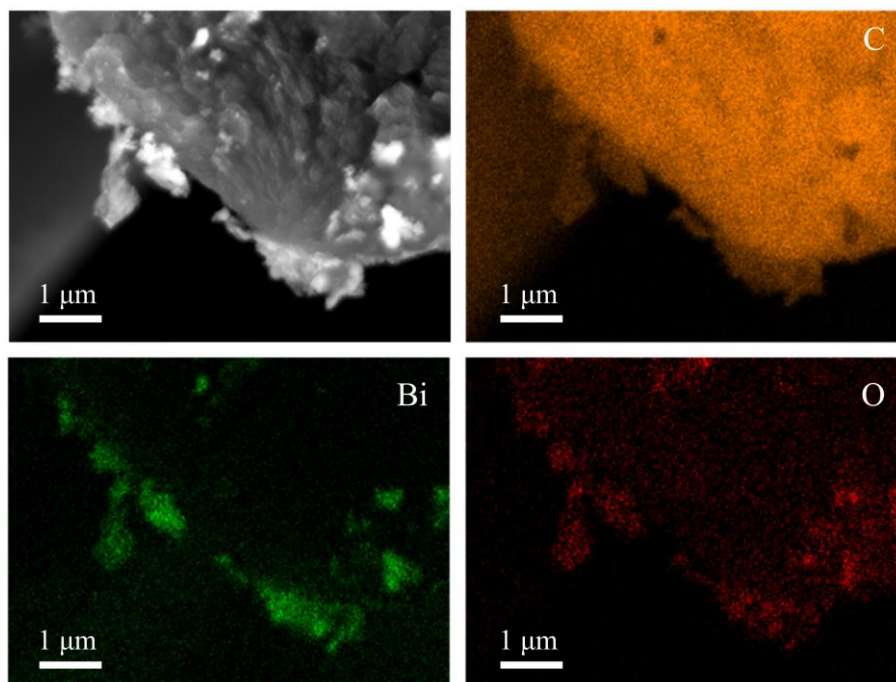

**Fig. S5** EDS elemental mapping images of a cross-section view of semi-embedded Bi NPs decorated carbon fiber, in which the Bi NPs decorated carbon felt was synthesized through carbothermal reduction.

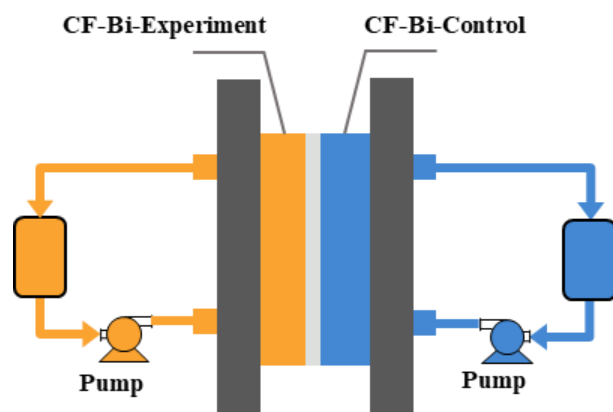

**Fig. S6** Schematic diagram of the scouring device. The semi-embedded Bi NPs decorated carbon felt (CF) was synthesized through carbothermal reduction and is referred to as CF-Bi-Control. The encased Bi NPs were prepared via the tannic acid-assisted strategy, which is referred to as CF-Bi-Experiment.

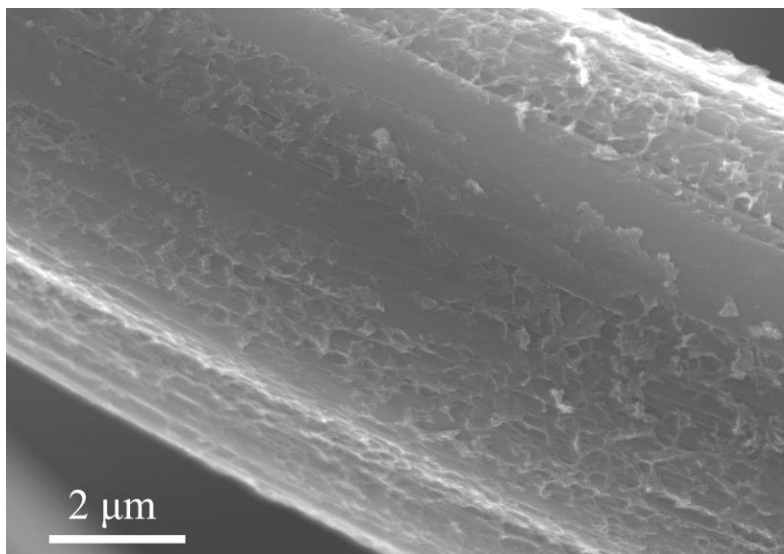

**Fig. S7** SEM image of Bismuth nanoparticles after long-term operation



**Table S1.** Performance comparison between the latest bismuth-based catalytic electrodes and this work.

| References                                                             | Area<br>(cm <sup>-2</sup> ) | Current density<br>(mA cm <sup>-2</sup> ) | EE<br>(%)     | Number of<br>cycles | EE retention<br>(%) |
|------------------------------------------------------------------------|-----------------------------|-------------------------------------------|---------------|---------------------|---------------------|
| Appl. Energy. <b>2019</b> ,<br>240, 226-235. <sup>[S1]</sup>           | ~4                          | 480                                       | 72.60%        | 200                 | NA                  |
| Small, <b>2020</b> . 16,<br>1907333. <sup>[S2]</sup>                   | ~4                          | 480                                       | 77.1±<br>0.2% | 1000                | 98.2%               |
| J. Mater. Chem. A.<br><b>2023</b> , 11, 8700-<br>8709. <sup>[S3]</sup> | ~4                          | 400                                       | 70.60%        | 450                 | NA                  |
| Adv. Mater. <b>2024</b> ,<br>36, 2305415. <sup>[S4]</sup>              | ~4                          | 400                                       | 76.72%        | 1500                | NA                  |
| J.Am.Chem.Soc.<br><b>2024</b> , 146, 26024-<br>26033. <sup>[S5]</sup>  |                             | 240                                       | 81.10%        | 1500                | NA                  |
| Electrochim. Acta.<br><b>2024</b> , 473, ~9<br>143439. <sup>[S6]</sup> | ~9                          | 200                                       | ~80.1%        | 100                 | NA                  |
| Electrochim. Acta.<br><b>2025</b> , 526, ~9<br>146190. <sup>[S7]</sup> | ~9                          | 200                                       | 80.20%        | 1500                | NA                  |
| J. Mater. Chem. A.<br><b>2025</b> . <sup>[S8]</sup>                    | ~16                         | 250                                       | 89.7%         | 1000                | NA                  |
| This work*                                                             | ~15                         | 400                                       | 72.11%        | 2000                | 99.97%              |

## Supplementary References

- [S1] H. R. Jiang, Y. K. Zeng, M. C. Wu, W. Shyy and T. S. Zhao, *Appl. Energy*, 2019, 240, 226-235.
- [S2] X. Zhou, X. Zhang, L. Mo, X. Zhou and Q. Wu, *Small*, 2020, 16, 1907333.
- [S3] Q.-a. Zhang, H. Yan, Y. Song, J. Yang, Y. Song and A. Tang, *J. Mater. Chem. A*, 2023, 11, 8700-8709.
- [S4] X. Zhang, A. Valencia, W. Li, K. Ao, J. Shi, X. Yue, R. Zhang and W. A. Daoud, *Adv. Mater.*, 2024, 36, 2305415.
- [S5] F. Xing, Q. Fu, F. Xing, J. Zhao, H. Long, T. Liu and X. Li, *Journal of the American Chemical Society*, 2024, 146, 26024-26033.
- [S6] Q. Li, D. Pei, X. Zhang and H. Sun, *Electrochim. Acta*, 2024, 473, 143439.
- [S7] L. Yang, Z. Fan, F. Cui, T. Wu, T. Fang, Y. Guo, L. Tian, B. Pang, G. He and X. Wu, *Electrochim. Acta*, 2025, 526, 146190.
- [S8] M. M. Omran, T. Al Najjar, N. K. Allam and E. N. El Sawy, *J. Mater. Chem. A*, 2025, DOI: 10.1039/D5TA00882D.
